# Supplementary material for: Microstructural engineering of hydrated vanadium pentoxide for boosted zinc ion thermoelectrochemical cells
Source: Royal Society of Chemistry journal article supplement (doi:10.1039/d2ta05882k), 2022-01-01
Supplement: d2ta05882k1.pdf [file d2ta05882k1.pdf]

## **Supporting Information**

### **Microstructural Engineering of Hydrated Vanadium Pentoxide for Boosted Zinc Ion Thermoelectrochemical Cells**

Zhiwei Li, Yinghong Xu, Langyuan Wu, Hui Dou, Xiaogang Zhang\*

\*Corresponding author. Email: [azhangxg@nuaa.edu.cn](mailto:azhangxg@nuaa.edu.cn) (X.Z.)

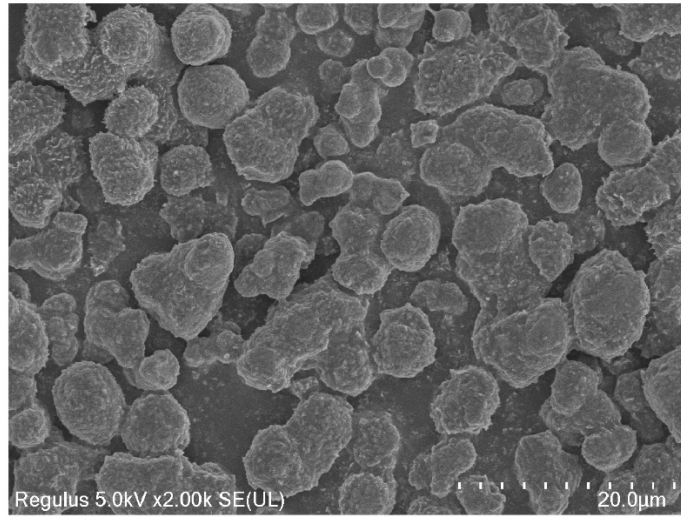

**Fig. S1.** SEM image of VOMS.

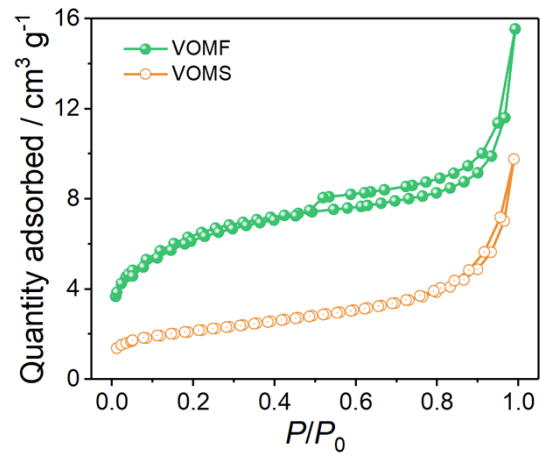

**Fig. S2.** Nitrogen adsorption-desorption isotherms of VOMS and VOMF samples.

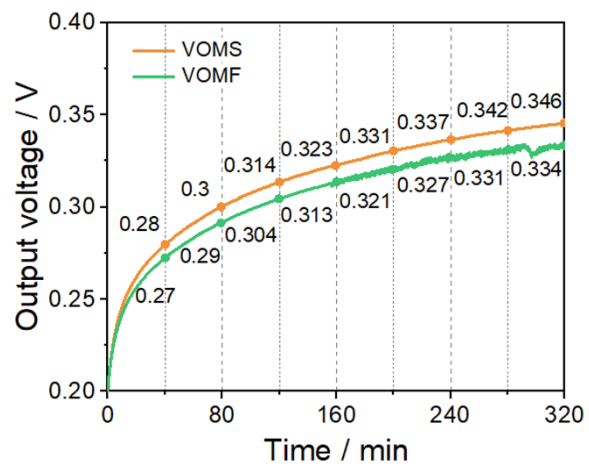

**Fig. S3.** Voltage profile during electrochemically self-charging.

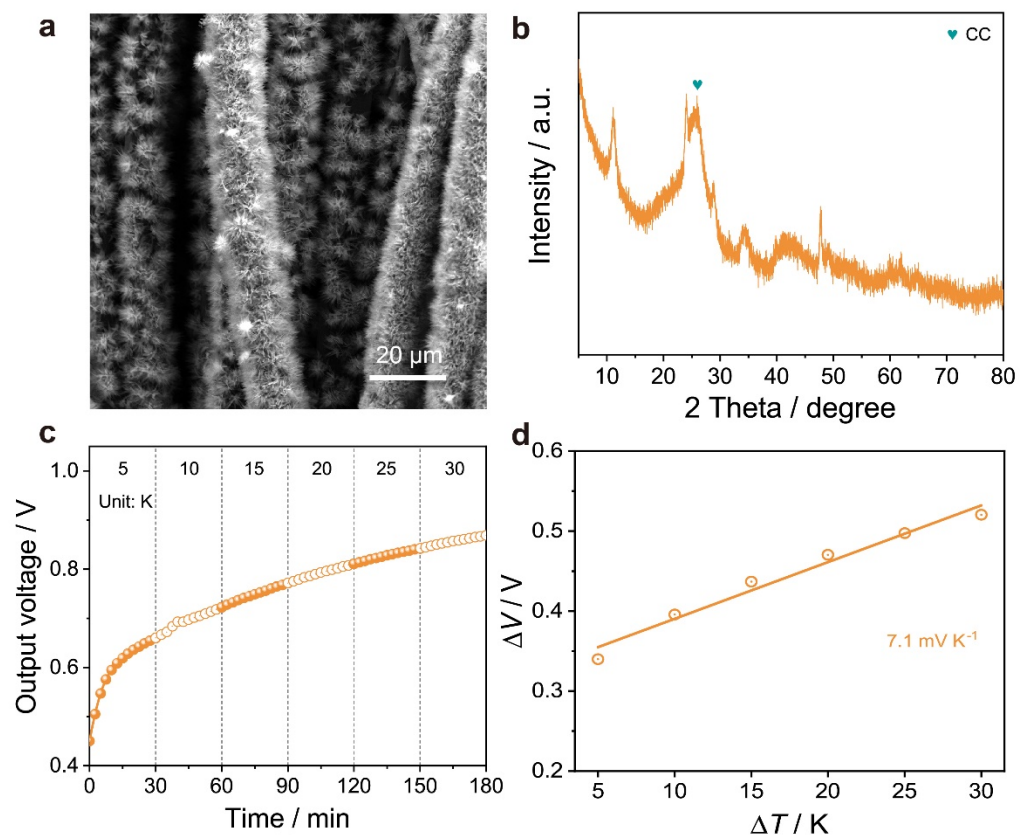

**Fig. S4.** The structure and performance of VOMF@CC. (a) SEM image. (b) XRD pattern. (c) Thermal charging behavior. (d) Seebeck coefficient.

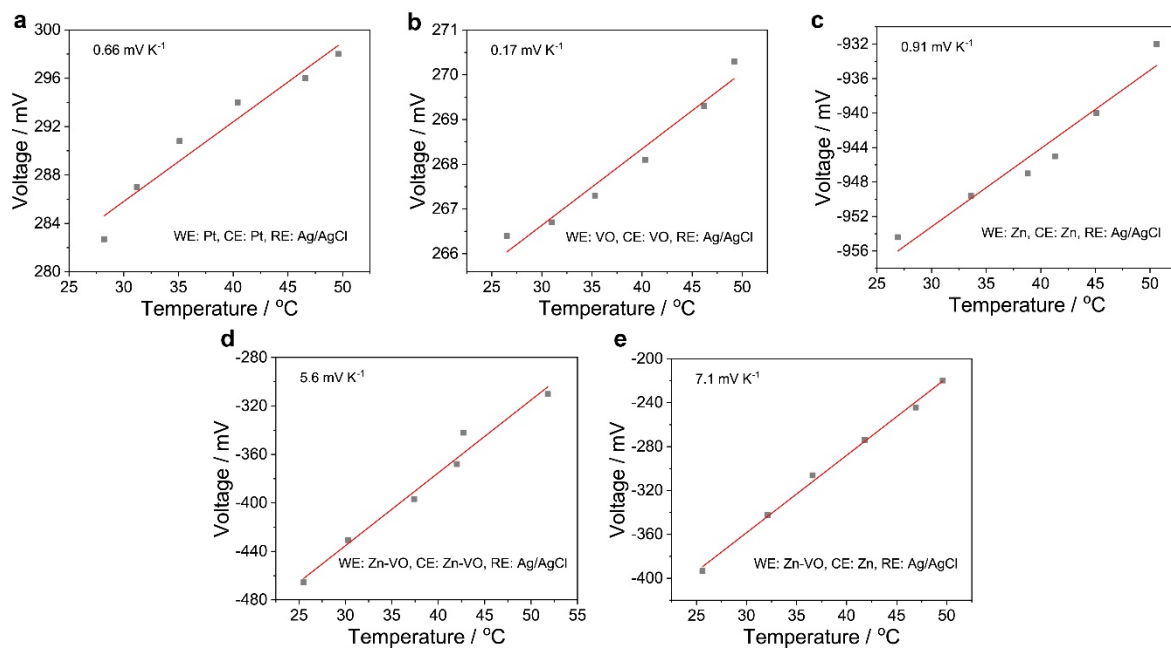

**Fig. S5.** Temperature dependence of the open-circuit voltage for various systems.

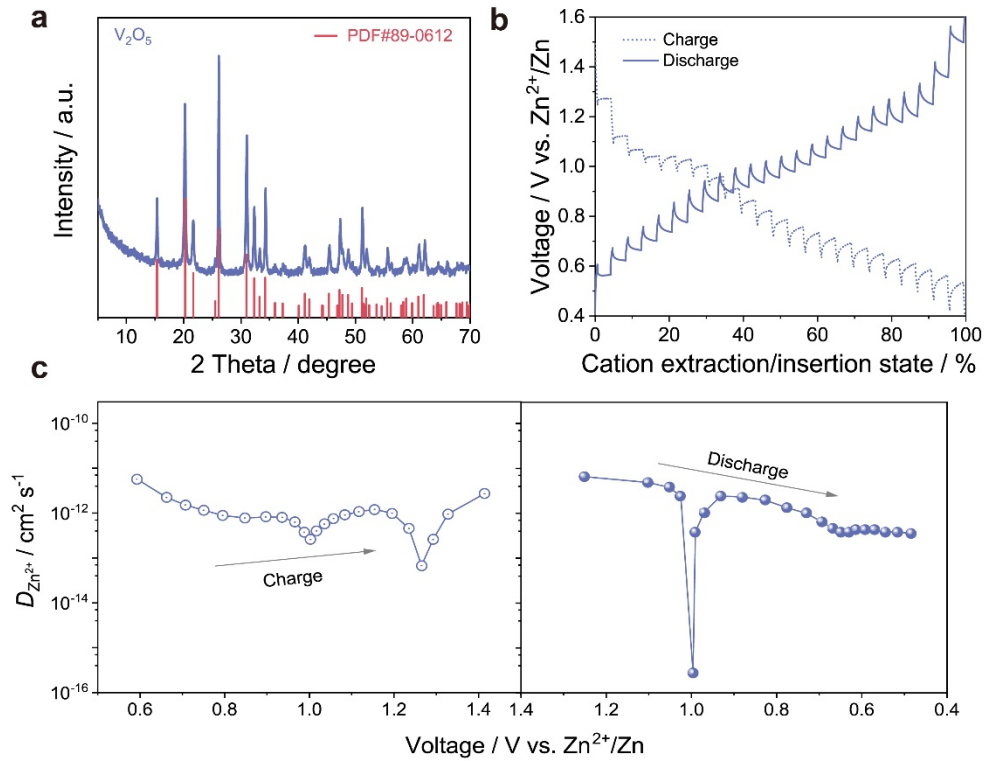

**Fig. S6.** (a) XRD pattern. (b) GITT curves and (c) calculated  $Zn^{2+}$  diffusion coefficients during charge and discharge process for VOMF-400 sample.

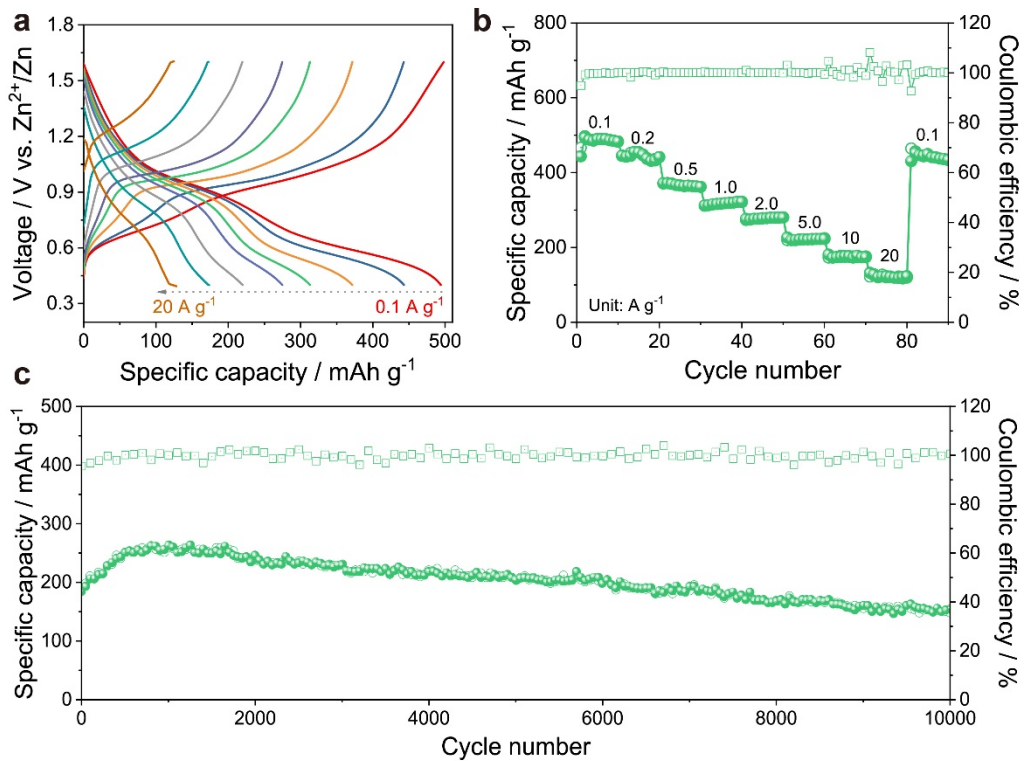

**Fig. S7.** Electrochemical performances of VOMF based zinc ion batteries. (a) GCD curves at various current densities. (b) Rate capability. (c) Long-term cyclic stability at  $10 \text{ A g}^{-1}$ .



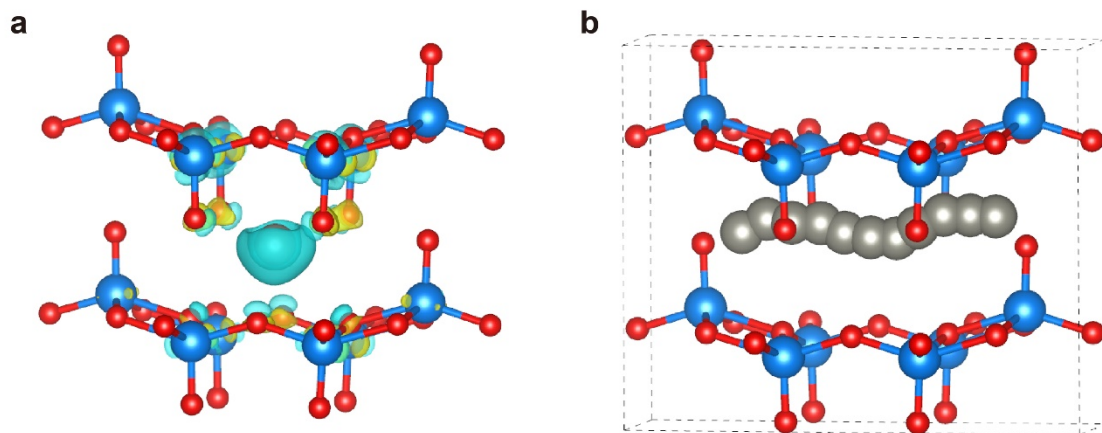

**Fig. S8.** (a) The electron density difference map after Zn<sup>2+</sup> intercalated into V<sub>2</sub>O<sub>5</sub> and (b) The optimized migration path of Zn<sup>2+</sup> in V<sub>2</sub>O<sub>5</sub>.
